# Supplementary material for: In Vitro Effect of Eucalyptus Essential Oils and Antiseptics (Chlorhexidine Gluconate and Povidone-Iodine) against Bacterial Isolates from Equine Wounds
Source: MDPI journal article supplement (doi:10.3390/vetsci11010012), 2023-12-26
Supplement: s1 [file s1]

**Table S1.** Clinical information of the horses and wounds selected for the study. Information regarding Gram-negative (*Escherichia coli*) strains

| <b>Isolate</b> | <b>Bacterial strains</b> | <b>Gender</b> | <b>Age</b>   | <b>Breed</b>       | <b>Lesion localization</b> |
|----------------|--------------------------|---------------|--------------|--------------------|----------------------------|
| E1             | <i>Escherichia coli</i>  | Female        | 13 years old | Pure Bred Lusitano | Trunk                      |
| E2             | <i>Escherichia coli</i>  | Female        | 13 years old | Pure Bred Lusitano | Trunk                      |
| E3             | <i>Escherichia coli</i>  | Female        | 13 years old | Pure Bred Lusitano | Trunk                      |
| E4             | <i>Escherichia coli</i>  | Male          | 10 years old | Pure Bred Lusitano | Head                       |
| E5             | <i>Escherichia coli</i>  | Female        | 6 years old  | Pure Bred Lusitano | Stifle                     |
| E6             | <i>Escherichia coli</i>  | Female        | 12 years old | Cross-bred         | Distal limb                |
| E7             | <i>Escherichia coli</i>  | Male          | 4 years old  | Arabian            | Distal limb                |
| E8             | <i>Escherichia coli</i>  | Female        | 4 years old  | Cross-bred         | Distal limb                |
| E9             | <i>Escherichia coli</i>  | Male          | 13 years old | Pure Bred Lusitano | Distal limb                |
| E10            | <i>Escherichia coli</i>  | Male          | 13 years old | Pure Bred Lusitano | Distal limb                |
| E11            | <i>Escherichia coli</i>  | Male          | 9 years old  | Pure Bred Lusitano | Distal limb                |
| E12            | <i>Escherichia coli</i>  | Male          | 9 years old  | Pure Bred Lusitano | Distal limb                |

**Table S2.** Clinical information of the horses and wounds selected for the study. Information regarding Gram-positive strains

| <b>Isolate</b> | <b>Bacterial strain</b>                | <b>Gender</b> | <b>Age</b>   | <b>Breed</b>       | <b>Lesion localization</b> |
|----------------|----------------------------------------|---------------|--------------|--------------------|----------------------------|
| <b>E13</b>     | <i>Staphylococcus aureus</i>           | Female        | 12 years old | Pure Bred Lusitano | Distal limb                |
| <b>E14</b>     | <i>Staphylococcus aureus</i>           | Female        | 12 years old | Pure Bred Lusitano | Distal limb                |
| <b>E15</b>     | <i>Staphylococcus aureus</i>           | Male          | 13 years old | Warmblood          | Distal limb                |
| <b>E16</b>     | <i>Staphylococcus aureus</i>           | Female        | 1 years old  | Cross-bred         | Distal limb                |
| <b>E17</b>     | <i>Staphylococcus aureus</i>           | Female        | 12 years old | Pure Bred Lusitano | Distal limb                |
| <b>E18</b>     | <i>Staphylococcus aureus</i>           | Male          | 4 years old  | Arabian            | Distal limb                |
| <b>E19</b>     | <i>Staphylococcus aureus</i>           | Female        | 4 years old  | Cross-bred         | Distal limb                |
| <b>E20</b>     | <i>Staphylococcus aureus</i>           | Male          | 18 years old | Pure Bred Lusitano | Neck                       |
| <b>E21</b>     | <i>Staphylococcus pseudintermedius</i> | Female        | 15 years old | Cross-bred         | Distal limb                |
| <b>E22</b>     | <i>Staphylococcus pseudintermedius</i> | Female        | 13 years old | Pure Bred Lusitano | Trunk                      |
| <b>E23</b>     | <i>Staphylococcus vitulinus</i>        | Male          | 9 years old  | Pure Bred Lusitano | Distal limb                |
| <b>E24</b>     | <i>Staphylococcus saprophyticus</i>    | Male          | 9 years old  | Pure Bred Lusitano | Distal limb                |

**Table S3.** Antibiotic susceptibility test results for *Escherichia coli* strains.

| <b>Bacterial</b> | <b>Antibiotics</b> |    |   |   |    |    |     |     |   |     |     |     |     |     |     |    |    |     |     |     |
|------------------|--------------------|----|---|---|----|----|-----|-----|---|-----|-----|-----|-----|-----|-----|----|----|-----|-----|-----|
| <b>Strains</b>   | TE                 | DO | C | N | CN | AK | ENR | PFX | F | SXT | MEM | ETP | IPM | AMC | AMP | KF | CL | EFT | CVN | CPD |
| <b>E1</b>        | S                  | S  | I | S | S  | S  | S   | S   | S | S   | S   | S   | S   | S   | S   | R  | R  | S   | S   | S   |
| <b>E2</b>        | S                  | S  | S | S | S  | S  | S   | S   | S | S   | S   | S   | S   | S   | S   | R  | R  | S   | S   | S   |
| <b>E3</b>        | S                  | S  | S | S | S  | S  | S   | S   | S | S   | S   | S   | S   | S   | S   | R  | R  | S   | S   | S   |
| <b>E4</b>        | R                  | I  | I | S | S  | S  | S   | S   | S | S   | S   | S   | S   | S   | S   | R  | R  | S   | S   | S   |
| <b>E5</b>        | S                  | S  | S | S | S  | S  | S   | S   | S | S   | S   | S   | S   | S   | S   | R  | R  | S   | S   | S   |
| <b>E6</b>        | S                  | S  | I | S | S  | S  | S   | S   | S | S   | S   | S   | S   | S   | S   | R  | R  | S   | S   | S   |
| <b>E7</b>        | S                  | S  | S | S | S  | S  | S   | S   | S | S   | S   | S   | S   | S   | S   | R  | R  | S   | S   | S   |
| <b>E8</b>        | S                  | S  | S | S | S  | S  | S   | S   | S | S   | S   | S   | S   | S   | S   | I  | R  | S   | S   | S   |
| <b>E9</b>        | S                  | S  | S | S | S  | S  | S   | S   | S | S   | S   | S   | S   | S   | S   | R  | R  | S   | S   | S   |
| <b>E10</b>       | S                  | S  | S | S | S  | S  | S   | S   | S | S   | S   | S   | S   | S   | S   | I  | R  | S   | S   | S   |
| <b>E11</b>       | S                  | S  | S | S | S  | S  | S   | S   | S | S   | S   | S   | S   | S   | S   | R  | R  | S   | S   | S   |
| <b>E12</b>       | S                  | S  | I | S | S  | S  | S   | S   | S | S   | S   | S   | S   | S   | S   | R  | R  | S   | S   | S   |

(TE<sub>30</sub>): tetracycline; (DO<sub>30</sub>): doxycycline; (C<sub>30</sub>): chloramphenicol; (N<sub>30</sub>): neomycin; (CN<sub>10</sub>): gentamicin; (AK<sub>30</sub>): amikacin; (ENR<sub>5</sub>): enrofloxacin; (PFX<sub>5</sub>): pefloxacin; (F<sub>100</sub>): nitrofurantoin; (SXT<sub>25</sub>): trimethoprim-sulfamethoxazole; (MEM<sub>10</sub>): meropenem; (ETP<sub>10</sub>): ertapenem; (IMP<sub>10</sub>): imipenem; (AMC<sub>30</sub>): amoxicillin/clavulanate; (AMP<sub>10</sub>): ampicillin; (KF<sub>30</sub>): cephalothin; (CL<sub>30</sub>): cephalixin; (EFT<sub>30</sub>): ceftiofur; (CVN<sub>30</sub>): cefovecin; (CPD<sub>10</sub>): cefpodoxime

**Table S4:** Antibiotic susceptibility test results for Gram-positive strains.

| <b>Bacterial strains</b> | <b>Identification</b>                  | <b>Antibiotics</b> |    |   |   |   |    |     |     |   |    |   |     |
|--------------------------|----------------------------------------|--------------------|----|---|---|---|----|-----|-----|---|----|---|-----|
|                          |                                        | TE                 | DO | C | K | N | CN | ENR | PFX | E | DA | F | SXT |
| E13                      | <i>Staphylococcus aureus</i>           | S                  | S  | S | S | S | S  | S   | S   | S | S  | S | S   |
| E14                      | <i>Staphylococcus aureus</i>           | S                  | S  | S | S | S | S  | S   | S   | S | S  | S | S   |
| E15                      | <i>Staphylococcus aureus</i>           | S                  | S  | S | S | S | S  | S   | S   | R | R  | S | S   |
| E16                      | <i>Staphylococcus aureus</i>           | S                  | S  | S | S | S | S  | S   | S   | S | S  | S | S   |
| E17                      | <i>Staphylococcus aureus</i>           | S                  | S  | S | S | S | S  | S   | S   | R | R  | S | S   |
| E18                      | <i>Staphylococcus aureus</i>           | S                  | S  | S | S | S | S  | S   | S   | R | R  | S | S   |
| E19                      | <i>Staphylococcus aureus</i>           | S                  | S  | S | S | S | S  | S   | S   | R | R  | S | S   |
| E20                      | <i>Staphylococcus aureus</i>           | R                  | R  | S | R | I | S  | R   | I   | R | R  | S | R   |
| E21                      | <i>Staphylococcus pseudintermedius</i> | S                  | S  | S | S | S | S  | S   | S   | S | S  | S | S   |
| E22                      | <i>Staphylococcus pseudintermedius</i> | R                  | R  | S | R | I | S  | R   | I   | R | R  | S | R   |
| E23                      | <i>Staphylococcus vitulinus</i>        | S                  | S  | S | S | S | S  | S   | S   | S | S  | S | S   |
| E24                      | <i>Staphylococcus saprophyticus</i>    | S                  | S  | S | S | S | S  | S   | S   | R | S  | S | S   |

(TE<sub>30</sub>): tetracycline; (DO<sub>30</sub>): doxycycline; (C<sub>30</sub>): chloramphenicol; (K<sub>30</sub>): kanamycin; (N<sub>30</sub>): neomycin; (CN<sub>10</sub>): gentamicin; (ENR<sub>5</sub>): enrofloxacin; (PFX<sub>5</sub>): pefloxacin; (E<sub>15</sub>): erythromycin; (DA<sub>2</sub>): clindamycin; (F<sub>100</sub>): nitrofurantoin; (SXT<sub>25</sub>): trimethoprim-sulfamethoxazole
